CORRECTION

# Correction: Advancing the measurement of knowledge, attitudes and practices of health workers who care for women and girls who have undergone female genital mutilation/ cutting (FGM/C): A qualitative exploration of expert opinion

The *PLOS ONE* Staff

## Notice of republication

This article was republished on August 30, 2023, to correct the copyright statement to reflect the WHO-affiliated copyright. The publisher apologizes for the errors. Please download this article again to view the correct version. The originally published, uncorrected article and the republished, corrected articles are provided here for reference.

## Supporting information

**S1 File. Originally published, uncorrected article.**  
(PDF)

**S2 File. Republished, corrected article.**  
(PDF)

## Reference

1. Marea CX, Warren N, Glass N, Ahmed W, Pallitto CC (2023) Advancing the measurement of knowledge, attitudes and practices of health workers who care for women and girls who have undergone female genital mutilation/ cutting (FGM/C): A qualitative exploration of expert opinion. *PLoS ONE* 18(4): e0284900. <https://doi.org/10.1371/journal.pone.0284900> PMID: 37104292

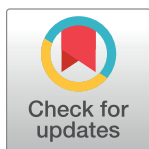

## OPEN ACCESS

**Citation:** The *PLOS ONE* Staff (2023) Correction: Advancing the measurement of knowledge, attitudes and practices of health workers who care for women and girls who have undergone female genital mutilation/ cutting (FGM/C): A qualitative exploration of expert opinion. *PLoS ONE* 18(9): e0291509. <https://doi.org/10.1371/journal.pone.0291509>

**Published:** September 8, 2023

**Copyright:** © 2023 The PLOS ONE Staff. This is an open access article distributed under the terms of the [Creative Commons Attribution License](https://creativecommons.org/licenses/by/4.0/), which permits unrestricted use, distribution, and reproduction in any medium, provided the original author and source are credited.
